# Supplementary material
Source: HighWire-hosted journal article supplement (https://www.annfammed.org/highwire/filestream/674/field_highwire_adjunct_files/0/Stephens_Supp_Fig.pdf)

## Supplemental materials for

Stephens MB. Behind the mask: identity formation and team building. *Ann Fam Med*. 2019;17(6):561-561.

Supplemental Figure 1

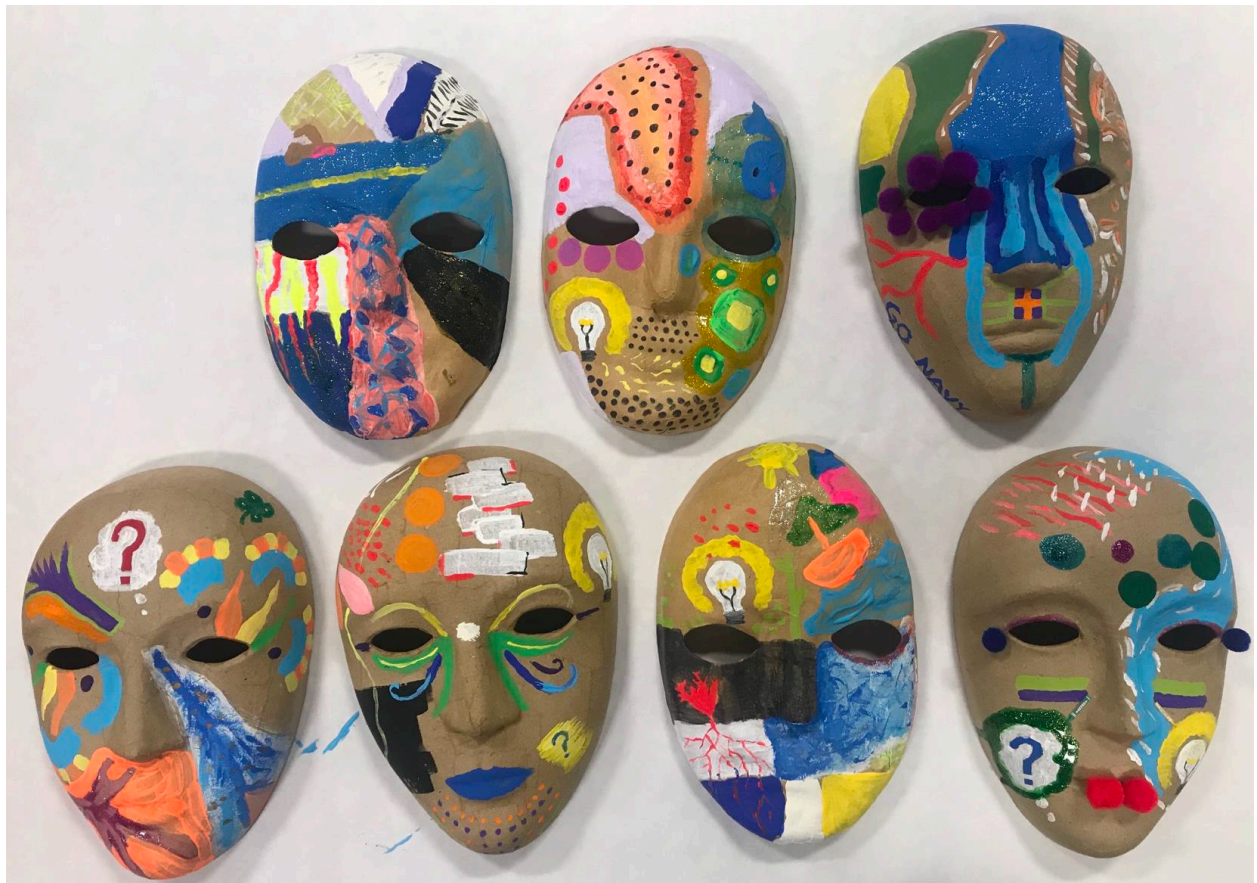

Supplement: Stephens_Supp_Fig.pdf [file Stephens_Supp_Fig.pdf]
